# Supplementary material
Source: PubMed Central journal article supplement (PMC3512039)
Supplement: mmc1.pdf [file mmc1.pdf]

# Supporting Information

## Inspection of the Engineered FhuA $\Delta C/\Delta 4L$ Protein Nanopore by Polymer Exclusion

David J. Niedzwiecki,<sup>‡</sup> Mohammad M. Mohammad,<sup>‡</sup> and Liviu Movileanu<sup>\*,‡,&,#</sup>

<sup>‡</sup>*Department of Physics, Syracuse University, 201 Physics Building, Syracuse, New York 13244-1130, USA*

<sup>&</sup>*Structural Biology, Biochemistry, and Biophysics Program, Syracuse University, 111 College Place, Syracuse, New York 13244-4100, USA*

<sup>#</sup>*Syracuse Biomaterials Institute, Syracuse University, 121 Link Hall, Syracuse, New York 13244, USA*

Running title: Sizing an engineered protein nanopore

*Key words:* • Protein engineering; • Single-molecule biophysics; • Single-channel electrical recordings; • The FhuA protein; • Polyethylene glycol

\***Corresponding author:** Department of Physics, Syracuse University, 201 Physics Building, Syracuse, New York 13244-1130, USA; Phone: 315-443-8078; Fax: 315-443-9103; E-mail: [lmovilea@physics.syr.edu](mailto:lmovilea@physics.syr.edu)

## 1. FhuA $\Delta C/\Delta 4L$ purification and refolding

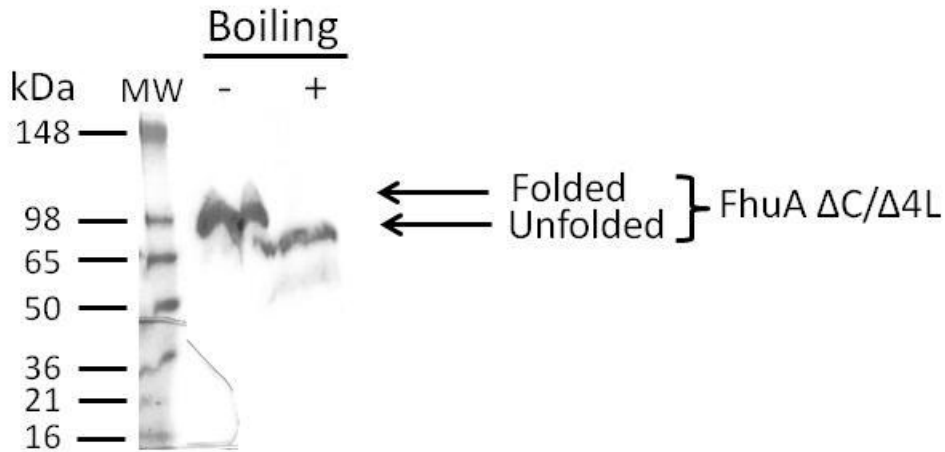

**Figure S1:** Coomassie, blue-stained SDS-PAGE gel indicating the purified FhuA  $\Delta C/\Delta 4L$  protein nanopore and its refolding. 5  $\mu\text{g}$  of protein samples were loaded on the gel without or after boiling for 5 minutes. Folded and unfolded FhuA  $\Delta C/\Delta 4L$  proteins are indicated by arrows. MW stands for the molecular weight standard.

## 2. Selection criteria of nanopores

The FhuA  $\Delta C/\Delta 4L$  nanopore inserts with a range of different conductances at a transmembrane potential of +40 mV. **Fig. S2** displays a histogram of the conductance of the nanopore at +40 mV. Only nanopores with conductance of  $4.0 \pm 0.2$  nS were selected. The reasoning behind this choice is that the FhuA  $\Delta C/\Delta 4L$  nanopores with closely similar conductance values are thought likely to have a similar structure.

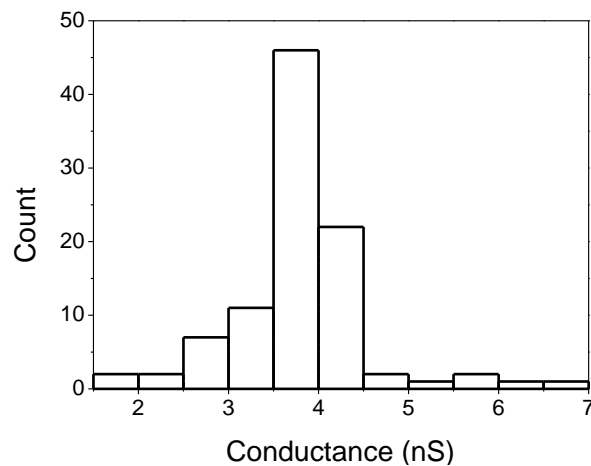

**Figure S2:** Histogram of different conductance values of the FhuA  $\Delta C/\Delta 4L$  protein nanopore. The conductance values are taken at +40 mV in 1 M KCl, 10 mM potassium phosphate, pH 7.4. Histogram was constructed from a subset of data representing step-wise insertions of 98 different nanopores.

### 3. Purity of Reagents

PEG molecular mass ranges were the following: PEG 200 ( $M_r$  190-210), PEG 300 ( $M_r$  285-315), PEG 600 ( $M_r$  570-630), PEG 1000 ( $M_r$  950-1050), PEG 1500 ( $M_r$  1400-1600), PEG 2000 ( $M_r$  1900-2200), PEG 3000 ( $M_r$  2700-3300), PEG 4000 ( $M_r$  3500-4500), PEG 6000 ( $M_r$  5000-7000), PEG 8000 ( $M_r$  7000-9000), PEG 10000 ( $M_r$  8500-11500), PEG 12000 ( $M_r$  11000-15000).

### 4. Perfusion procedure of polymer solutions

The change of solution was accomplished by perfusion of 15% (w/w) PEG or dextran into the bottom of the chamber via a 0.5-mm diameter channel at a rate of 1 mL/min for 4 minutes. The steady perfusion of polymer solution from the bottom creates a fluid interface with the buffer solution in the chamber and displaces the buffer solution upward, where it is removed from the top of the chamber. After the desired experiments were performed, the resultant chamber solution was removed and its conductivity measured to confirm it matched the conductivity value corresponding to 15% (w/w) bulk PEG or dextran. This method consistently produced chamber solution conductivity values that matched the conductivity values obtained from the solution source.

### 5. Estimates of the bulk conductivity of the solutions used in this work

**Table S1: Bulk conductivity of the PEG-containing solutions used in this work**

| Solution <sup>a</sup> | Conductivity (mS/cm) |
|-----------------------|----------------------|
| PEG300                | 57.3                 |
| PEG600                | 56.6                 |
| PEG1000               | 56.1                 |
| PEG1500               | 57.0                 |
| PEG2000               | 56.6                 |
| PEG3000               | 57.6                 |
| PEG4000               | 57.6                 |
| PEG6000               | 57.2                 |
| PEG8000               | 57.2                 |
| PEG10000              | 56.6                 |
| PEG12000              | 56.8                 |
| Dextran               | 62.8                 |

<sup>a</sup>Both PEG and dextran solutions were 15% (w/w) in 1 M KCl, 10 mM potassium phosphate, pH 7.4 . 1 M KCl solution was buffered with 10 mM potassium phosphate, pH 7.4 and had a conductivity of 98.6 mS/cm.

## 6. Single-channel experiments with dextran

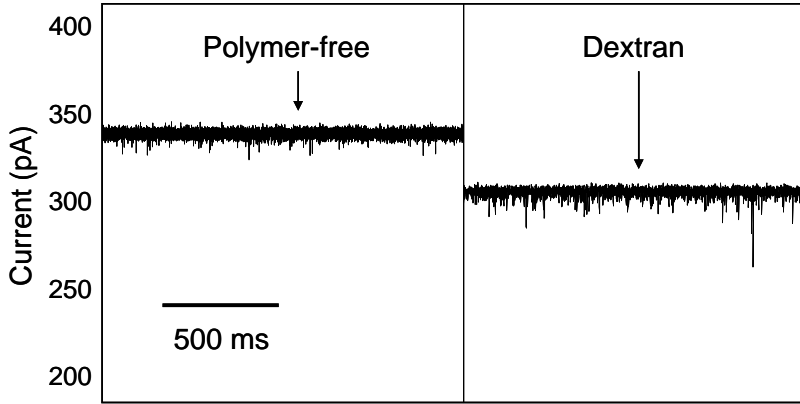

**Figure S3:** Effect of dextran on the single-channel current of a single FhuA  $\Delta C/\Delta 4L$  nanopore. The single-channel electrical trace on the left side shows the data in 1M KCl, 10mM potassium phosphate, pH 7.4. The trace on the right side shows the data from the same nanopore after solution has been changed to 15% (w/w) 40000 Da dextran in 1 M KCl, 10 mM potassium phosphate, pH 7.4. The applied transmembrane potential was +80 mV. A reduction in the single-channel conductance of  $(8.8 \pm 2.4)\%$  was observed. Note the increased noise.

## 7. Calculations of expected conductance

A rough calculation of the expected single-channel conductance of the FhuA  $\Delta C/\Delta 4L$  protein nanopore can be made assuming a conical geometry, which is derived from our PEG experiments, or an elliptical geometry, which approximates the crystal structure of the wild-type protein.

### 7.1. Calculation of the single-channel conductance of the FhuA $\Delta C/\Delta 4L$ nanopore assuming a conical geometry

Here,  $g$ ,  $r_{eff}$  and  $\chi$  denote the single-channel conductance of the nanopore, the effective radius of the nanopore and the conductivity of the bulk aqueous phase, respectively.  $l$  indicates the length of the nanopore. The conductance of the nanopore may be approximated by  $g \approx \pi r_{eff}^2 \frac{\chi}{l}$ .

Let  $r_{eff} = \left( \frac{\pi}{l} \int_0^l dz S(z) \right)^{-1/2}$  where  $S(z)$  is the area of the cross-section of the nanopore at a point  $z$  along the axis, then

$$g \approx \frac{\pi \chi}{l \left( \frac{\pi}{l} \int_0^l dz S(z) \right)},$$

Assume that the nanopore can be expressed as a simple symmetrical cone, where  $a(z)$  is the perpendicular distance of the cone from the  $z$ -axis at point  $z$ .

Then,

$$g = \frac{\chi}{\int_0^l \frac{dz}{\pi(a(z))^2}}$$

$$g = \pi\chi \left( \int_0^l \frac{dz}{(a(z))^2} \right)^{-1}$$

$$g = \pi\chi \left( \int_0^l \frac{dz}{(a(0) - mz)^2} \right)^{-1}$$

Where  $m$  is a constant representing the slope of the cylinder given by  $m = \frac{a(0) - a(l)}{l}$ .

$$g = \pi\chi \left( \frac{1}{m(a(0) - mz)} \Big|_0^l \right)^{-1}$$

$$g = \frac{\pi\chi a(0)a(l)}{l}$$

Relying on the PEG measurements and the bulk conductivity of 1M KCl, we may substitute in  $\chi = 112 \times 10^{-1} \text{ S/m}^2$ ,  $a(0) = 8 \times 10^{-10} \text{ m}$ ,  $a(l) = 5 \times 10^{-10} \text{ m}$  and  $l = 50 \times 10^{-10} \text{ m}$ , and get  $g = 2.81 \text{ nS}$ .

## 7.2. Calculation of the single-channel conductance of the FhuA $\Delta C/\Delta 4L$ nanopore using a smooth-walled ellipsoid geometry

Following the same equation as above, we may find the expected conductance of a smoothly changing ellipsoid.

$$g \approx \frac{\pi\chi}{l \left( \frac{\pi}{l} \int_0^l \frac{dz}{S(z)} \right)}$$

We will assume that the cross-sectional area may be expressed as an ellipse with major and minor axes given by  $a(z)$  and  $b(z)$ , respectively.

The above integral will now become

$$\int_0^l \frac{dz}{a(z)b(z)}$$

If we assume that  $a(z)$  and  $b(z)$  change with a constant slope, we have,

$$\int_0^l \frac{dz}{(a(0) - mz)(b(0) - \zeta z)}$$

where  $m$  and  $\zeta$  denote the slopes of the ellipse axes, with respect to the  $z$ -axis.

From the crystal structure we may estimate values of  $a(0) = 1.3 \times 10^{-9}$  m,  $b(0) = 1.95 \times 10^{-9}$  m,  $l = 4.5 \times 10^{-9}$  m,  $m = 1/30$ ,  $\zeta = 3/10$ . Using these parameters, we find that the single-channel conductance of the nanopore is  $g = 3.4$  nS.

#### Reference List

1. Rostovtseva, T. K.; Nestorovich, E. M.; Bezrukov, S. M. Partitioning of differently sized poly(ethylene glycol)s into OmpF porin. *Biophys. J.* **2002**, *82* (1), 160-169.
2. Talaga, D. S.; Li, J. Single-molecule protein unfolding in solid state nanopores. *J. Am. Chem. Soc.* **2009**, *131* (26), 9287-9297.
